# Supplementary material for: Date Vinegar: First Isolation of Acetobacter and Formulation of a Starter Culture
Source: MDPI journal article supplement (doi:10.3390/foods13091389), 2024-04-30
Supplement: s1 [file s1]

## Date vinegar: Isolation of *Acetobacter* and formulation of a starter culture

Zahra S. Al-Kharousi<sup>1\*</sup>, Nasser Al-Habsi<sup>1</sup>, Zainab Al-Ramadhani<sup>1</sup>, Fatma A. Al-Malki<sup>1</sup>

<sup>1</sup>Department of Food Science and Nutrition, College of Agricultural and Marine Sciences, Sultan Qaboos University, P.O. Box: 34, Al-Khoud, Postal Code: 123, Muscat, Oman

\* **Correspondence:** Zahra S. Al-Kharousi, email: [umohaned@squ.edu.om](mailto:umohaned@squ.edu.om)

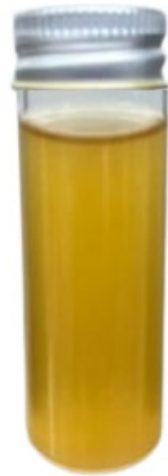

**Figure S1.** Sample 3 of date vinegar produced using a formulated starter culture after 4 days of fermentation.

**Table S1.** Pearson's correlation values for different parameters for spontaneous vinegar samples.

|                   | Fermentation time | °Brix   | pH      | Glucose | Fructose | Methanol | Ethanol | Acetic acid |
|-------------------|-------------------|---------|---------|---------|----------|----------|---------|-------------|
| Fermentation time | 1.0000            | -0.9806 | -0.5411 | -0.2699 | -0.3265  | -0.9028  | -0.6273 | 0.9883      |
| °Brix             | -0.9806           | 1.0000  | 0.6770  | 0.3472  | 0.4175   | 0.8466   | 0.4735  | -0.9617     |
| pH                | -0.5411           | 0.6770  | 1.0000  | 0.4832  | 0.5728   | 0.2170   | -0.2955 | -0.4551     |
| Glucose           | -0.2699           | 0.3472  | 0.4832  | 1.0000  | 0.9561   | 0.0615   | -0.1082 | -0.2127     |
| Fructose          | -0.3265           | 0.4175  | 0.5728  | 0.9561  | 1.0000   | 0.0673   | -0.1639 | -0.2559     |
| Methanol          | -0.9028           | 0.8466  | 0.2170  | 0.0615  | 0.0673   | 1.0000   | 0.8108  | -0.9497     |
| Ethanol           | -0.6273           | 0.4735  | -0.2955 | -0.1082 | -0.1639  | 0.8108   | 1.0000  | -0.6819     |
| Acetic acid       | 0.9883            | -0.9617 | -0.4551 | -0.2127 | -0.2559  | -0.9497  | -0.6819 | 1.0000      |

**Table S2.** Pearson's correlation values for different parameters for vinegar samples inoculated with starter cultures.

|                   | Fermentation time | °Brix   | pH      | Glucose | Fructose | Methanol | Ethanol | Acetic acid |
|-------------------|-------------------|---------|---------|---------|----------|----------|---------|-------------|
| Fermentation time | 1.0000            | -0.8990 | -0.8873 | -0.9164 | -0.9370  | 0.6573   | 0.9100  | 0.7358      |
| °Brix             | -0.8990           | 1.0000  | 0.7571  | 0.9187  | 0.9715   | -0.6497  | -0.8063 | -0.7380     |
| pH                | -0.8873           | 0.7571  | 1.0000  | 0.9254  | 0.7677   | -0.7521  | -0.8980 | -0.5750     |
| Glucose           | -0.9164           | 0.9187  | 0.9254  | 1.0000  | 0.9224   | -0.7095  | -0.9079 | -0.6423     |
| Fructose          | -0.9370           | 0.9715  | 0.7677  | 0.9224  | 1.0000   | -0.5936  | -0.8457 | -0.7202     |
| Methanol          | 0.6573            | -0.6497 | -0.7521 | -0.7095 | -0.5936  | 1.0000   | 0.4549  | 0.6247      |
| Ethanol           | 0.9100            | -0.8063 | -0.8980 | -0.9079 | -0.8457  | 0.4549   | 1.0000  | 0.4979      |
| Acetic acid       | 0.7358            | -0.7380 | -0.5750 | -0.6423 | -0.7202  | 0.6247   | 0.4979  | 1.0000      |
